# Supplementary material
Source: ML conference proceedings conference paper supplement (https://proceedings.mlr.press/v37/giguere15.html)
Supplement: Supplementary file [file giguere15-supp.pdf]

---

## Supplementary Material for:

# Algorithms for the Hard Pre-Image Problem of String Kernels and the General Problem of String Prediction

---

Sébastien Giguère<sup>1,2\*</sup>

Amélie Rolland<sup>2\*</sup>

François Laviolette<sup>2</sup>

Mario Marchand<sup>2</sup>

GIGUERE.SEBASTIEN@GMAIL.COM

AMELIE.ROLLAND.1@ULAAVAL.CA

FRANCOIS.LAVIOLETTE@IFT.ULAAVAL.CA

MARIO.MARCHAND@IFT.ULAAVAL.CA

<sup>1</sup> Institute for Research in Immunology and Cancer, University of Montreal, Montreal, Canada

<sup>2</sup> Department of Computer Science and Software Engineering, Laval University, Quebec, Canada

\* These authors contributed equally to this work.

## 1. Algorithms

The details of the branch and bound algorithm are given in Algorithm 1. The best first search is detailed in Algorithm 2.

---

### Algorithm 1 Branch and bound for finding $\mathbf{y}^* \in \mathcal{A}^\ell$

---

```
1: function branch_and_bound( $\ell, n, \mathcal{A}$ )
2:    $\mathcal{Q}$  : empty priority queue ordering (string, bound)
      pairs in descending order of bound values
3:    $best \leftarrow Node(empty\_string, 0)$ 
4:   for all  $s \in \mathcal{A}^n$  do
5:      $\mathcal{Q}.push(Node(s, F(s, \ell)))$ 
6:   end for
7:   while  $node \leftarrow \mathcal{Q}.pop()$  &  $node.bound >$ 
       $best.bound$  do
8:      $node \leftarrow bf\_search(node, best, \mathcal{Q}, \ell, \mathcal{A})$ 
9:     if  $node.bound > best.bound$  then
10:       $best \leftarrow node$ 
11:    end if
12:  end while
13:  return  $best.string, best.bound$ 
14: end function
```

---

---

### Algorithm 2 Best first search

---

```
1: function bf_search( $node, best, \mathcal{Q}, \ell, \mathcal{A}$ )
2:   while  $|node.string| < \ell$  &  $node.bound >$ 
       $best.bound$  do
3:      $best\_child \leftarrow Node(empty\_string, 0)$ 
4:     for all  $a \in \mathcal{A}$  do
5:        $s' \leftarrow concatenate(a, node.string)$ 
6:       if  $F(s', \ell) > best.bound$  then
7:         if  $F(s', \ell) > best\_child.bound$  then
8:            $best\_child \leftarrow Node(s', F(s', \ell))$ 
9:         end if
10:         $\mathcal{Q}.push(Node(s', F(s', \ell)))$ 
11:       end if
12:     end for
13:      $node \leftarrow best\_child$ 
14:      $\mathcal{Q}.remove(best\_child)$ 
15:   end while
16:   return  $node$ 
17: end function
```

---

## 2. Bounds

### 2.1. Details of $f$ when $\sigma_p > 0$ and $\sigma_c = 0$

Let us recall that  $f$  must lower bound  $K_{\mathcal{Y}}(\mathbf{y}, \mathbf{y}')$ , given that string  $\mathbf{y}$  has  $\mathbf{y}'$  as suffix:

$$f(\mathbf{y}', \ell) \leq \min_{\mathbf{y} \in \mathcal{A}^{\ell-p} \times \{\mathbf{y}'\}} K_{\mathcal{Y}}(\mathbf{y}, \mathbf{y}). \quad (1)$$

The main idea behind the bound is that each  $l$ -gram in string  $\mathbf{y}$  is indexed by a starting position that varies between 0 and  $\ell - l$ , where  $\ell = |\mathbf{y}|$ . The kernel value is obtained by summing the comparison of all  $l$ -gram pairs. To get the bound, we decide to split the comparison of the  $l$ -gram pairs in three groups that depend on their starting positions. Each group is bounded independently. The final bound is defined as

$$f(\mathbf{y}', \ell) \stackrel{\text{def}}{=} GS(\mathbf{y}', \mathbf{y}', n, \sigma_p, \sigma_c) + 2YY'(\mathbf{y}', \ell, n, \sigma_p, \sigma_c) + YY(\ell - |\mathbf{y}'|, n, \sigma_p, \sigma_c). \quad (2)$$

The first group of  $l$ -grams are those in position  $\ell - |\mathbf{y}'|$  to  $\ell - l$ . All these  $l$ -grams belong to the suffix  $\mathbf{y}'$  and are compared with themselves using the GS kernel function. This part of the bound is exact.

The second group compares those in positions 0 to  $\ell - |\mathbf{y}'| - 1$  with those of the suffix  $\mathbf{y}'$  in position  $\ell - |\mathbf{y}'|$  to  $\ell - l$ . A lower bound on the comparison of these  $l$ -gram pairs is given by the function

$$YY'(\mathbf{y}', \ell, n, \sigma_p, \sigma_c) = \sum_{l=1}^n \sum_{i=0}^{\ell-|\mathbf{y}'|-1} \min_{\mathbf{y} \in \mathcal{A}^l} \sum_{j=0}^{|\mathbf{y}'|-l} \exp\left(\frac{-(i-(j+\ell-|\mathbf{y}'|))^2}{2\sigma_p^2}\right) \times I(y_1, \dots, y_l = y'_{j+1}, \dots, y'_{j+l}). \quad (3)$$

This function effectively lower bounds the contribution of  $l$ -grams in positions 0 to  $\ell - |\mathbf{y}'| - 1$  when compared to the suffix  $\mathbf{y}'$  as it always selects the  $l$ -gram in  $\mathcal{A}^l$  minimising the contribution. Observe that the index  $j$  refers to positions in  $\mathbf{y}'$ . For that reason, in the position penalty term  $\exp\left(\frac{-(i-j)^2}{2\sigma_p^2}\right)$ ,  $j$  was offset by  $\ell - |\mathbf{y}'|$  to correspond to positions in  $\mathbf{y}$ .

The last group compares those in positions 0 to  $\ell - |\mathbf{y}'| - 1$  with themselves. A lower bound on the comparison of these  $l$ -gram pairs is given by the function

$$YY(d, n, \sigma_p, \sigma_c) = \sum_{l=1}^n \sum_{i=0}^{d-1} \sum_{j=0}^{d-1} S(i, j, l, d, \sigma_p, \sigma_c), \quad (4)$$

where

$$S(i, j, l, d, \sigma_p, \sigma_c) = \begin{cases} 1 & \text{if } i = j, \\ \exp\left(\frac{-d^2}{2\sigma_p^2}\right) & \text{if } |i - j| \in \{|\mathcal{A}|^l, 2|\mathcal{A}|^l, 3|\mathcal{A}|^l, \dots\}, \\ 0 & \text{otherwise,} \end{cases}$$

which accounts for the minimum number of  $l$ -gram repetitions at largest distance.

Finally, since all  $l$ -gram pairs were considered in one of the three functions, this makes  $f(\mathbf{y}', \ell)$  a valid lower bound.

### 2.2. Details of $f$ when $\sigma_p > 0$ and $\sigma_c > 0$

The strategy to obtain a bound in this case is the same as in the previous case: the  $l$ -gram pairs are divided in the same groups but the functions  $YY'$  and  $YY$  that lower bound their contributions are modified to take into account  $\psi^l$ .

For  $YY'$ , the identity function between  $l$ -grams is replaced by the second exponential term of the GS kernel. Hence,

$$YY'(\mathbf{y}', \ell, n, \sigma_p, \sigma_c) = \sum_{l=1}^n \sum_{i=0}^{\ell-|\mathbf{y}'|-1} \min_{\mathbf{y} \in \mathcal{A}^l} \sum_{j=0}^{|\mathbf{y}'|-l} \exp\left(\frac{-(i-j+|\mathbf{y}'|-\ell)^2}{2\sigma_p^2}\right) \times \exp\left(\frac{-\|\psi^l(y_1, \dots, y_l) - \psi^l(y'_{j+1}, \dots, y'_{j+l})\|^2}{2\sigma_c^2}\right). \quad (5)$$

For  $YY$ , only the function  $S$  needs to be redefined as

$$S(i, j, l, d, \sigma_p, \sigma_c) = \exp\left(\frac{-(i-j)^2}{2\sigma_p^2}\right) \exp\left(\frac{-l(D(i, j))}{2\sigma_c^2}\right)$$

where

$$D(i, j) = \begin{cases} 0 & \text{if } i = j, \\ \max_{(a, a') \in \mathcal{A}^2} \|\psi(a) - \psi(a')\|^2 & \text{otherwise.} \end{cases}$$

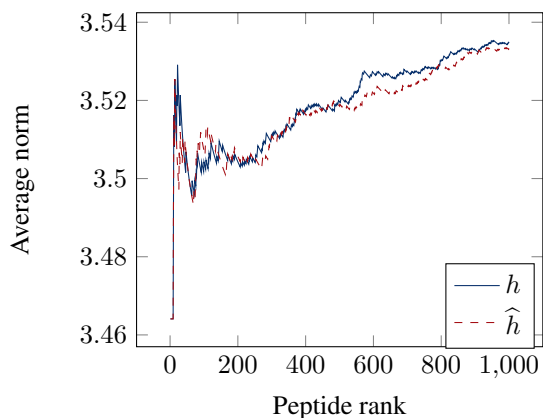

Figure 1. The cumulative moving average of norm  $\|\phi_{\mathbf{y}}(\mathbf{y})\|$  for the 1,000 peptides having the highest predicted bioactivities for the BPPs dataset.

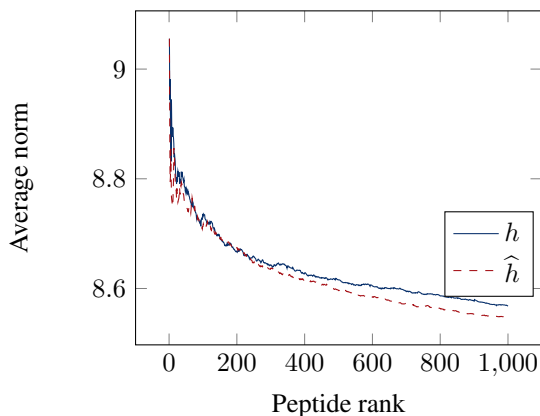

Figure 2. The cumulative moving average of norm  $\|\phi_{\mathbf{y}}(\mathbf{y})\|$  for the 1,000 peptides having the highest predicted bioactivities for the CAMPs dataset.

### 3. Additional Figures

Figure 1 and Figure 2 present additional results for the cumulative moving average of the norm of the 1000 top peptides maximizing the un-normalized predictor  $h$  and the normalized predictor  $\hat{h}$ . For both BPPs and CAMPs datasets, these results show that the norms of the peptides maximizing  $h$  and  $\hat{h}$  are similar. This was expected since the chosen  $\sigma_p$  values are small ( $\sigma_p = 0.2$  for BPPs and  $\sigma_p = 0.8$  for CAMPs).

Figure 3 and Figure 4 compare the ability of each method to handle strings of different lengths when  $\sigma_p = \infty$ . On both datasets, the peptide with the highest bioactivity for the un-normalized predictor  $h_{\sigma_p=\infty}$  has the longest length. For the normalized predictor  $\hat{h}_{\sigma_p=\infty}$ , the best length is 7 for the BPPs dataset and 20 for the CAMPs dataset. As explained previously, the longer a string  $\mathbf{y}$  is, the larger  $\|\phi_{\mathbf{y}}(\mathbf{y})\|$  generally is, which effectively influences  $h(\mathbf{y})$ . Consequently, if the length of the output string is not constrained,  $\mathbf{y}^h$  will be biased toward long strings, especially when the value of  $\sigma_p$  is large.

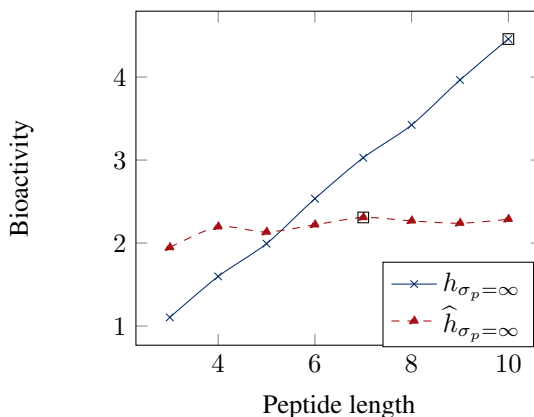

Figure 3. Maximum predicted bioactivity as a function of the peptide length for the BPPs dataset.

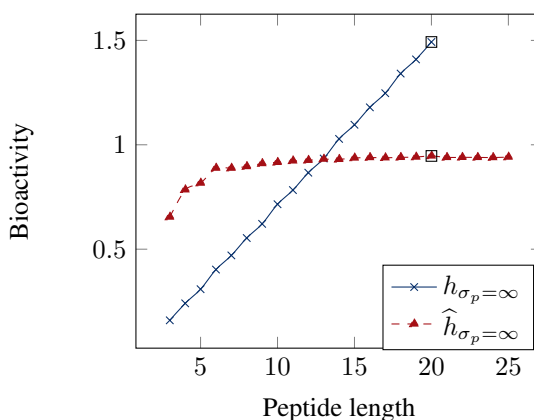

Figure 4. Maximum predicted bioactivity as a function of the peptide length for the CAMPs dataset.
